# Supplementary material for: Splatter: simulation of single-cell RNA sequencing data
Source: PubMed Central journal article supplement (PMC5596896; doi:10.1186/s13059-017-1305-0), 2017-09-12
Supplement: 13059_2017_1305_MOESM3_ESM.pdf [file 13059_2017_1305_MOESM3_ESM.pdf]

# R Session Information

2017-07-20

Code version: 905b291f81259313ee06d326524c31541d622055

## Session information

Details of the R environment and packages used for analysis.

```
## setting value
## version R version 3.4.0 (2017-04-21)
## system x86_64, linux-gnu
## ui X11
## language (EN)
## collate en_US.UTF-8
## tz <NA>
## date 2017-07-20
##
## package * version date
## AnnotationDbi 1.38.1 2017-06-05
## assertthat 0.2.0 2017-04-11
## backports 1.1.0 2017-05-22
## base * 3.4.0 2017-05-30
## beeswarm 0.2.3 2016-04-25
## bindr 0.1 2016-11-13
## bindrcpp * 0.2 2017-06-17
## Biobase * 2.36.2 2017-05-31
## BiocGenerics * 0.22.0 2017-05-31
## BiocParallel * 1.10.1 2017-05-31
## biomaRt 2.32.1 2017-06-13
## bit 1.1-12 2014-04-09
## bit64 0.9-7 2017-05-08
## bitops 1.0-6 2013-08-17
## blob 1.1.0 2017-06-17
## broom 0.4.2 2017-02-13
## caTools 1.17.1 2014-09-10
## cellranger 1.1.0 2016-07-27
## checkmate 1.8.3 2017-07-03
## class 7.3-14 2015-08-30
## clues * 0.5.9 2016-10-14
## cluster 2.0.6 2017-03-10
## codetools 0.2-15 2016-10-05
## colorspace 1.3-2 2016-12-14
## compiler 3.4.0 2017-05-30
## cowplot * 0.7.0 2016-10-28
## data.table 1.10.4 2017-02-01
## datasets * 3.4.0 2017-05-30
## DBI 0.7 2017-06-18
## DelayedArray 0.2.7 2017-06-05
## DEoptimR 1.0-8 2016-11-19
## devtools * 1.13.2 2017-06-02
```

|    |                  |         |            |
|----|------------------|---------|------------|
| ## | digest           | 0.6.12  | 2017-01-27 |
| ## | doParallel       | 1.0.10  | 2015-10-14 |
| ## | doRNG            | 1.6.6   | 2017-04-10 |
| ## | dplyr            | * 0.7.1 | 2017-06-22 |
| ## | e1071            | 1.6-8   | 2017-02-02 |
| ## | edgeR            | 3.18.1  | 2017-06-14 |
| ## | evaluate         | 0.10    | 2016-10-11 |
| ## | forcats          | 0.2.0   | 2017-01-23 |
| ## | foreach          | 1.4.3   | 2015-10-13 |
| ## | foreign          | 0.8-68  | 2017-04-24 |
| ## | gdata            | 2.18.0  | 2017-06-06 |
| ## | GenomeInfoDb     | 1.12.2  | 2017-06-13 |
| ## | GenomeInfoDbData | 0.99.0  | 2017-05-31 |
| ## | GenomicRanges    | 1.28.3  | 2017-05-31 |
| ## | ggbeeswarm       | 0.5.3   | 2016-12-01 |
| ## | ggplot2          | * 2.2.1 | 2016-12-30 |
| ## | glue             | 1.1.1   | 2017-06-21 |
| ## | gplots           | 3.0.1   | 2016-03-30 |
| ## | graphics         | * 3.4.0 | 2017-05-30 |
| ## | grDevices        | * 3.4.0 | 2017-05-30 |
| ## | grid             | 3.4.0   | 2017-05-30 |
| ## | gridExtra        | 2.2.1   | 2016-02-29 |
| ## | gtable           | 0.2.0   | 2016-02-26 |
| ## | gtools           | 3.5.0   | 2015-05-29 |
| ## | haven            | 1.0.0   | 2016-09-23 |
| ## | hms              | 0.3     | 2016-11-22 |
| ## | htmltools        | 0.3.6   | 2017-04-28 |
| ## | httpuv           | 1.3.3   | 2015-08-04 |
| ## | httr             | 1.2.1   | 2016-07-03 |
| ## | IRanges          | 2.10.2  | 2017-05-31 |
| ## | iterators        | 1.0.8   | 2015-10-13 |
| ## | jsonlite         | 1.5     | 2017-06-01 |
| ## | KernSmooth       | 2.23-15 | 2015-06-29 |
| ## | knitr            | * 1.16  | 2017-05-18 |
| ## | lattice          | 0.20-35 | 2017-03-25 |
| ## | lazyeval         | 0.2.0   | 2016-06-12 |
| ## | limma            | 3.32.2  | 2017-06-14 |
| ## | locfit           | 1.5-9.1 | 2013-04-20 |
| ## | lubridate        | 1.6.0   | 2016-09-13 |
| ## | magrittr         | * 1.5   | 2014-11-22 |
| ## | Matrix           | 1.2-10  | 2017-04-28 |
| ## | matrixStats      | 0.52.2  | 2017-04-14 |
| ## | memoise          | 1.1.0   | 2017-04-21 |
| ## | methods          | * 3.4.0 | 2017-05-30 |
| ## | mime             | 0.5     | 2016-07-07 |
| ## | mnormt           | 1.5-5   | 2016-10-15 |
| ## | modelr           | 0.1.0   | 2016-08-31 |
| ## | munsell          | 0.4.3   | 2016-02-13 |
| ## | mvtnorm          | 1.0-6   | 2017-03-02 |
| ## | nlme             | 3.1-131 | 2017-02-06 |
| ## | parallel         | * 3.4.0 | 2017-05-30 |
| ## | pcaPP            | 1.9-72  | 2017-06-27 |
| ## | pheatmap         | 1.0.8   | 2015-12-11 |
| ## | pkgconfig        | 2.0.1   | 2017-03-21 |

|    |                      |           |            |
|----|----------------------|-----------|------------|
| ## | pkgmaker             | 0.22      | 2014-05-14 |
| ## | plyr                 | 1.8.4     | 2016-06-08 |
| ## | psych                | 1.7.5     | 2017-05-03 |
| ## | purrr                | * 0.2.2.2 | 2017-05-11 |
| ## | R6                   | 2.2.2     | 2017-06-17 |
| ## | RColorBrewer         | 1.1-2     | 2014-12-07 |
| ## | Rcpp                 | 0.12.12   | 2017-07-15 |
| ## | RCurl                | 1.95-4.8  | 2016-03-01 |
| ## | readr                | * 1.1.1   | 2017-05-16 |
| ## | readxl               | 1.0.0     | 2017-04-18 |
| ## | registry             | 0.3       | 2015-07-08 |
| ## | reshape2             | 1.4.2     | 2016-10-22 |
| ## | rhdf5                | 2.20.0    | 2017-05-31 |
| ## | rjson                | 0.2.15    | 2014-11-03 |
| ## | rlang                | 0.1.1     | 2017-05-18 |
| ## | rmarkdown            | * 1.6     | 2017-06-15 |
| ## | rngtools             | 1.2.4     | 2014-03-06 |
| ## | robustbase           | 0.92-7    | 2016-12-09 |
| ## | ROCR                 | 1.0-7     | 2015-03-26 |
| ## | rprojroot            | 1.2       | 2017-01-16 |
| ## | rrcov                | 1.4-3     | 2016-09-06 |
| ## | RSQLite              | 2.0       | 2017-06-19 |
| ## | rstudioapi           | 0.6       | 2016-06-27 |
| ## | rvest                | 0.3.2     | 2016-06-17 |
| ## | S4Vectors            | 0.14.3    | 2017-06-05 |
| ## | SC3                  | * 1.4.2   | 2017-07-13 |
| ## | scales               | 0.4.1     | 2016-11-09 |
| ## | scater               | * 1.4.0   | 2017-06-14 |
| ## | shiny                | 1.0.3     | 2017-04-26 |
| ## | shinydashboard       | 0.6.1     | 2017-06-14 |
| ## | splatter             | * 1.1.2   | 2017-07-16 |
| ## | stats                | * 3.4.0   | 2017-05-30 |
| ## | stats4               | 3.4.0     | 2017-05-30 |
| ## | stringi              | 1.1.5     | 2017-04-07 |
| ## | stringr              | 1.2.0     | 2017-02-18 |
| ## | SummarizedExperiment | 1.6.3     | 2017-05-31 |
| ## | tibble               | * 1.3.3   | 2017-05-28 |
| ## | tidyr                | * 0.6.3   | 2017-05-15 |
| ## | tidyverse            | * 1.1.1   | 2017-01-27 |
| ## | tools                | 3.4.0     | 2017-05-30 |
| ## | tximport             | 1.4.0     | 2017-05-31 |
| ## | utils                | * 3.4.0   | 2017-05-30 |
| ## | vipor                | 0.4.5     | 2017-03-22 |
| ## | viridis              | 0.4.0     | 2017-03-27 |
| ## | viridisLite          | 0.2.0     | 2017-03-24 |
| ## | withr                | 1.0.2     | 2016-06-20 |
| ## | WriteXLS             | 4.0.0     | 2015-12-07 |
| ## | XML                  | 3.98-1.9  | 2017-06-19 |
| ## | xml2                 | 1.1.1     | 2017-01-24 |
| ## | xtable               | 1.8-2     | 2016-02-05 |
| ## | XVector              | 0.16.0    | 2017-05-31 |
| ## | yaml                 | 2.1.14    | 2016-11-12 |
| ## | zlibbioc             | 1.22.0    | 2017-05-31 |
| ## | source               |           |            |

```
## Bioconductor
## CRAN (R 3.4.0)
## CRAN (R 3.4.0)
## local
## CRAN (R 3.4.0)
## CRAN (R 3.4.0)
## CRAN (R 3.4.0)
## Bioconductor
## Bioconductor
## Bioconductor
## Bioconductor
## CRAN (R 3.4.0)
## local
## CRAN (R 3.4.0)
## CRAN (R 3.4.0)
## local
## CRAN (R 3.4.0)
## Bioconductor
## CRAN (R 3.4.0)
## Bioconductor
## CRAN (R 3.4.0)
## Bioconductor
## Bioconductor
## Bioconductor
## CRAN (R 3.4.0)
## CRAN (R 3.4.0)
## CRAN (R 3.4.0)
## CRAN (R 3.4.0)
## local
## local
## local
## CRAN (R 3.4.0)
```

```
## CRAN (R 3.4.0)
## Bioconductor
## CRAN (R 3.4.0)
## Bioconductor
## CRAN (R 3.4.0)
## local
## CRAN (R 3.4.0)
## local
## CRAN (R 3.4.0)
## cran (@0.12.12)
## CRAN (R 3.4.0)
## Bioconductor
## CRAN (R 3.4.0)
## cran (@1.2)
## CRAN (R 3.4.0)
## CRAN (R 3.4.0)
```

```
## CRAN (R 3.4.0)
## CRAN (R 3.4.0)
## Bioconductor
## Bioconductor
## CRAN (R 3.4.0)
## Bioconductor
## CRAN (R 3.4.0)
## CRAN (R 3.4.0)
## Github (0shlack/splatter@5df5a7c)
## local
## local
## CRAN (R 3.4.0)
## CRAN (R 3.4.0)
## Bioconductor
## CRAN (R 3.4.0)
## CRAN (R 3.4.0)
## CRAN (R 3.4.0)
## local
## Bioconductor
## local
## CRAN (R 3.4.0)
## Bioconductor
## CRAN (R 3.4.0)
## Bioconductor
```
